# Supplementary material for: Single molecule fluorescence correlation spectroscopy of single apoptotic cells using a red-fluorescent caspase probe
Source: Royal Society of Chemistry journal article supplement (doi:10.1039/c2an16173g), 2012-01-01
Supplement: c2an16173g.pdf [file c2an16173g.pdf]

## Electronic Supplementary Information

### Single Molecule Fluorescence Correlation Spectroscopy of Single Apoptotic Cells Using a Red-Fluorescent Caspase Probe

Meicong Dong,<sup>1</sup> Michelle M. Martinez,<sup>1</sup> Michael F. Mayer, Dimitri Pappas\*

Department of Chemistry and Biochemistry, Texas Tech University

Lubbock, TX 79409.

<sup>1</sup>Both authors contributed equally to this work.

\*Corresponding Author, d.pappas@ttu.edu

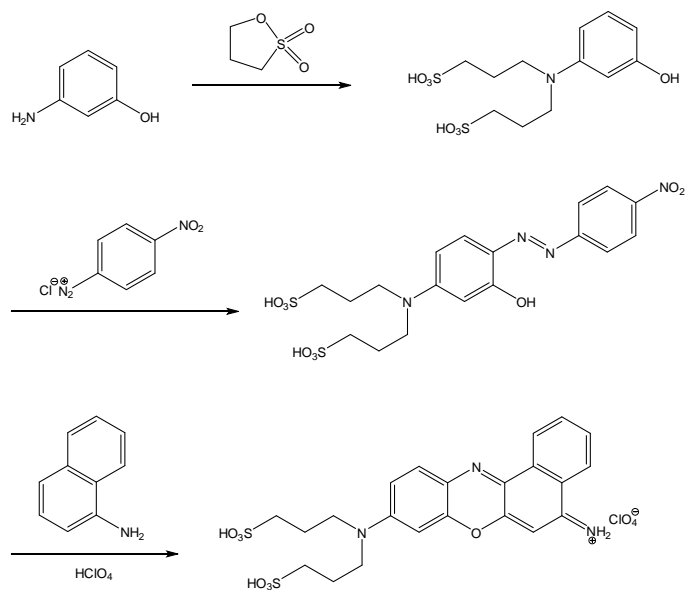

Scheme 1. Synthesis of 2SBPO dye.

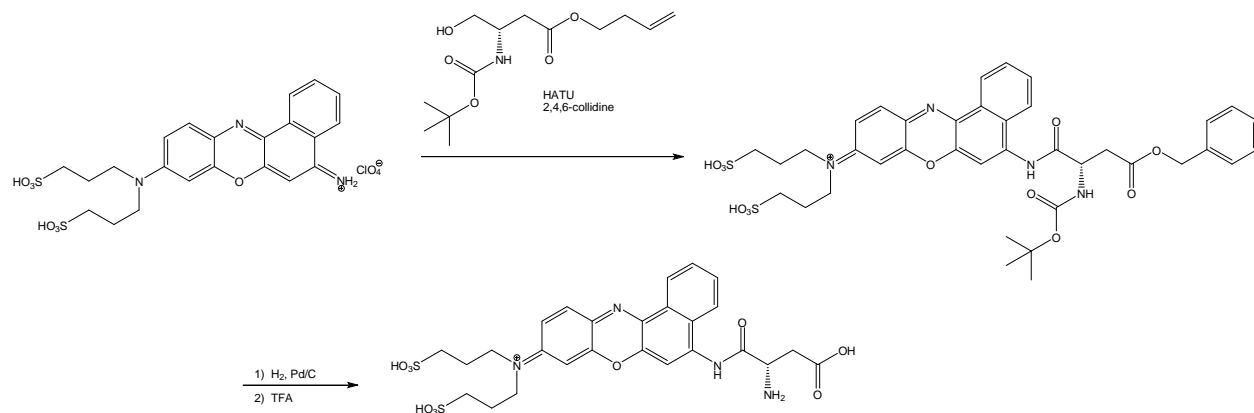

Scheme 2. Synthesis of 2SBPO-Casp
